# Supplementary material
Source: PubMed Central journal article supplement (PMC5325111)
Supplement: NIHMS812348-supplement-Supplemental_tables.pdf [file NIHMS812348-supplement-Supplemental_tables.pdf]

## Supplemental Tables

**Table S1. Subject Clinical and Demographical Characteristics**

|                                                   | HAND (n=28)       | Normal Cognition (n=33) | p-value |
|---------------------------------------------------|-------------------|-------------------------|---------|
| Gender, n (%) Female                              | 17 (60)           | 18 (54)                 | 0.627   |
| Age, mean (SD) years                              | 34.0 (7.4)        | 35.3 (6.5)              | 0.373   |
| CD4 T-lymphocyte Count, median                    | 255               | 213                     | 0.238   |
| Plasma Viral Load, median log <sub>10</sub> (IQR) | 4.96 (4.65, 5.59) | 4.77 (3.95, 5.13)       | 0.081   |

**Table S2. Comparing NC and HAND groups at entry by Wilcoxon two-sample test**

| Cytokine      | Z score | p-value |
|---------------|---------|---------|
| Fractalkine   | -0.2641 | 0.7917  |
| IL-6          | -0.8488 | 0.396   |
| IL-8          | 3.0685  | 0.0022  |
| IL-10         | 0.3049  | 0.7604  |
| IP-10         | 0.4865  | 0.6266  |
| MCP-1         | 6.0654  | <.0001  |
| TNF- $\alpha$ | -1.0219 | 0.3068  |

**Table S3. Comparisons between HAND, NC, and HAND that became NC after one year of cART\***

| Cytokine      | Chi-square | df | p-value ** |
|---------------|------------|----|------------|
| Fractalkine   | 1.0669     | 2  | 0.5866     |
| IL-6          | 1.0854     | 2  | 0.5812     |
| IL-8          | 17.1719    | 2  | 0.0002     |
| IL-10         | 1.087      | 2  | 0.5807     |
| IP-10         | 3.429      | 2  | 0.1801     |
| MCP-1         | 15.1574    | 2  | 0.0005     |
| TNF- $\alpha$ | 2.2595     | 2  | 0.3231     |

\* HAND (n=8) vs. NC (n=25) vs. HAND -> NC (n=16)

\*\* Kruskal-Wallis Test

**Table S4. Spearman correlations between supernatant cytokine levels and their plasma or CSF levels**

| Cytokine             | Supernatant vs. Plasma         | Supernatant vs. CSF            |
|----------------------|--------------------------------|--------------------------------|
| Entry                |                                |                                |
| IL-8                 | r = 0.039, p = 0.775, n = 55   | r = - 0.226, p = 0.178, n = 37 |
| MCP-1                | r = 0.115, p = 0.402, n = 55   | r = - 0.005, p = 0.976, n = 37 |
| TNF- $\alpha$        | r = 0.008, p = 0.953, n = 55   | r = 0.048, p = 0.777, n = 37   |
| After 1 yr treatment |                                |                                |
| IL-8                 | r = 0.210, p = 0.249, n = 32   | r = - 0.400, p = 0.505, n = 5  |
| MCP-1                | r = - 0.070, p = 0.704, n = 32 | r = 0.100, p = 0.873, n = 5    |
| TNF- $\alpha$        | r = 0.006, p = 0.972, n = 32   | r = 0.158, p = 0.800, n = 5    |
| Delta (Entry - yr 1) |                                |                                |
| IL-8                 | r = 0.102, p = 0.606, n = 28   | r = - 0.4, p = 0.6, n = 4      |
| MCP-1                | r = 0.096, p = 0.618, n = 28   | r = 0.2, p = 0.8, n = 4        |
| TNF- $\alpha$        | r = - 0.137, p = 0.486, n = 28 | r = 0.2, p = 0.8, n = 4        |

**Table S5. Spearman correlations between cytokine and CD14+ enriched HIVDNA**

| Cytokine             | Correlation with CD14 HIV NDA |                            |                            |
|----------------------|-------------------------------|----------------------------|----------------------------|
|                      | Entry                         | 1 year                     | Delta (entry - 1 year)     |
| Fractalkine          | r = - 0.129, p=0.344, n=56    | r = - 0.077, p=0.600, n=49 | r = - 0.026, p=0.868, n=44 |
| IL-6                 | r = - 0.243, p=0.071, n=56    | r = - 0.025, p=0.863, n=49 | r = - 0.028, p=0.856, n=44 |
| IL-8                 | r=0.332 , p=0.012, n=56       | r = - 0.178, p=0.221, n=49 | r = - 0.167, p=0.280, n=44 |
| IL-10                | r = - 0.118, p=0.385, n=56    | r = - 0.073, p=0.620, n=49 | r=0.093, p=0.549, n=44     |
| IP-10                | r = - 0.128, p=0.346, n=56    | r = - 0.347, p=0.015, n=49 | r = - 0.262, p=0.085, n=44 |
| MCP-1                | r=0.388, p=0.003, n=56        | r = - 0.046, p=0.752, n=49 | r=0.077, p=0.620, n=44     |
| TNF- $\alpha$        | r = - 0.322 , p=0.016, n=56   | r = - 0.050, p=0.735, n=49 | r=0.010, p=0.948, n=44     |
| CSF IL-8             | r=0.038, p=0.810, n=42        | r = - 0.928, p=0.008, n=6  | r=0.029, p=0.957, n=6      |
| CSF MCP-1            | r = - 0.020, p=0.900, n=42    | r = - 0.464, p=0.354, n=6  | r=0.429, p=0.397, n=6      |
| CSF TNF- $\alpha$    | r=0.128, p=0.418, n=42        | r = - 0.403, p=0.428, n=6  | r=0.200, p=0.704, n=6      |
| Plasma IL-8          | r = - 0.046, p=0.725, n=60    | r=0.042, p=0.803, n=37     | r=0.183, p=0.280, n=37     |
| Plasma MCP-1         | r = - 0.052, p=0.691, n=60    | r = - 0.241, p=0.150, n=37 | r = - 0.001, p=0.995, n=37 |
| Plasma TNF- $\alpha$ | r=0.106, p=0.42, n=60         | r=0.080, p=0.640, n=37     | r=0.035, p=0.838, n=37     |
